# Supplementary material
Source: PubMed Central journal article supplement (PMC1626601)
Supplement: plntcell_tpc.105.039404_1.pdf [file plntcell_tpc.105.039404_1.pdf]

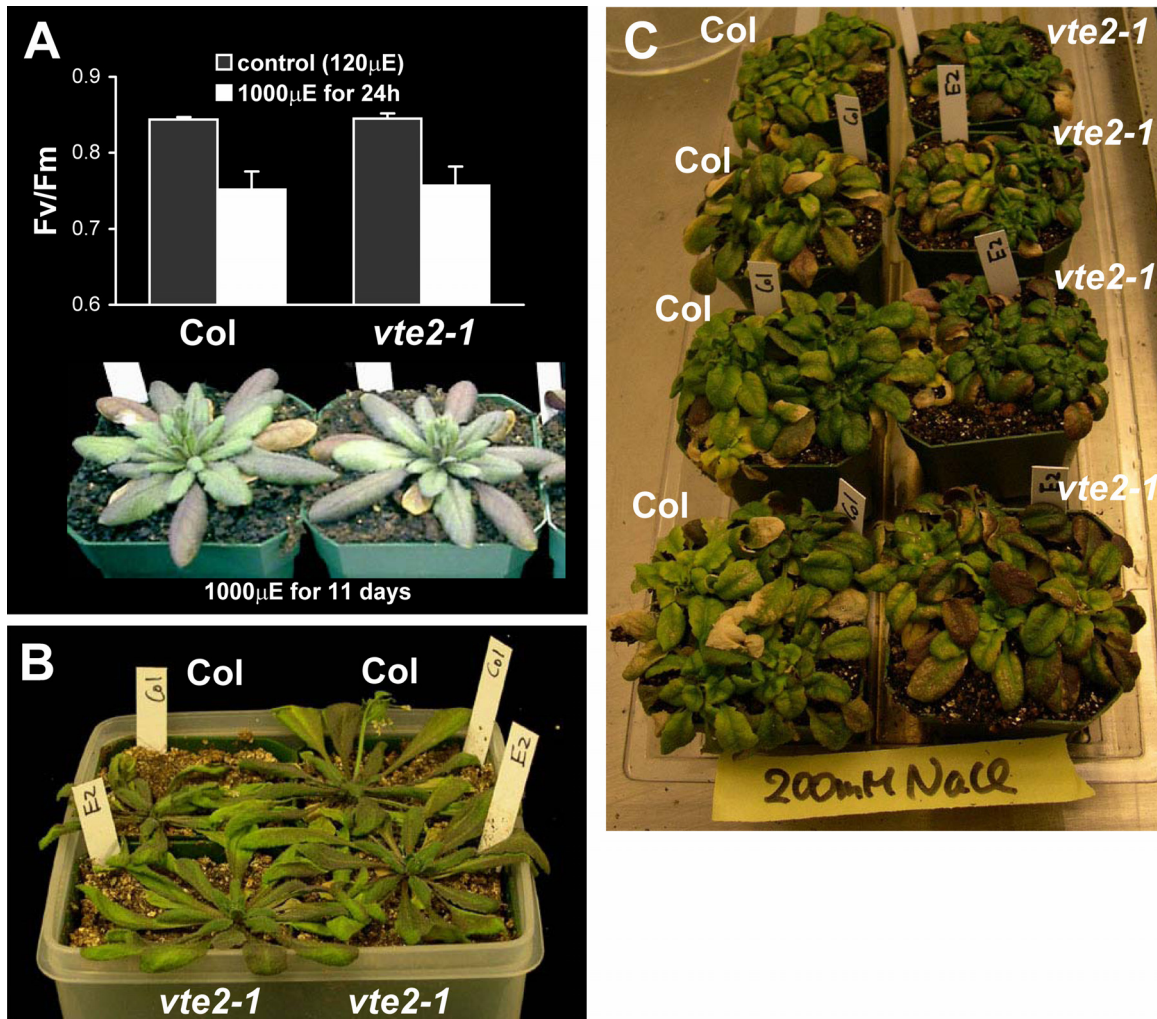

**Supplemental Figure 1.** Phenotypes of the *vte2* Mutant and Col During HL, Drought and Salinity Stress.

The *vte2* mutant and Col were grown at permissive conditions for four to five weeks prior to the indicated stress treatments.

**(A)** Four-week-old plants were grown under permissive conditions and then transferred to HL1000 stress (16 h 1000  $\mu\text{mol photon m}^{-2} \text{s}^{-1}$  light/8h darkness at 22°C) in the middle of the day. The graph shows the Fv/Fm of Col and *vte2-1* grown under permissive conditions or after 24 h of HL1000. The image shows representative plants of Col and *vte2-1* after 11 days of HL1000.

**(B)** Five-week-old plants grown under permissive conditions were subjected to drought stress. The image shows representative plants of Col and *vte2-1* that had water withheld for 10 days.

**(C)** Four-week-old plants grown under permissive conditions were subjected to salinity stress. The image shows representative Col and *vte2-1* plants that were watered with 200 mM NaCl every other day for three weeks.
