# Supplementary material
Source: PubMed Central journal article supplement (PMC1626601)
Supplement: plntcell_tpc.105.039404_2.pdf [file plntcell_tpc.105.039404_2.pdf]

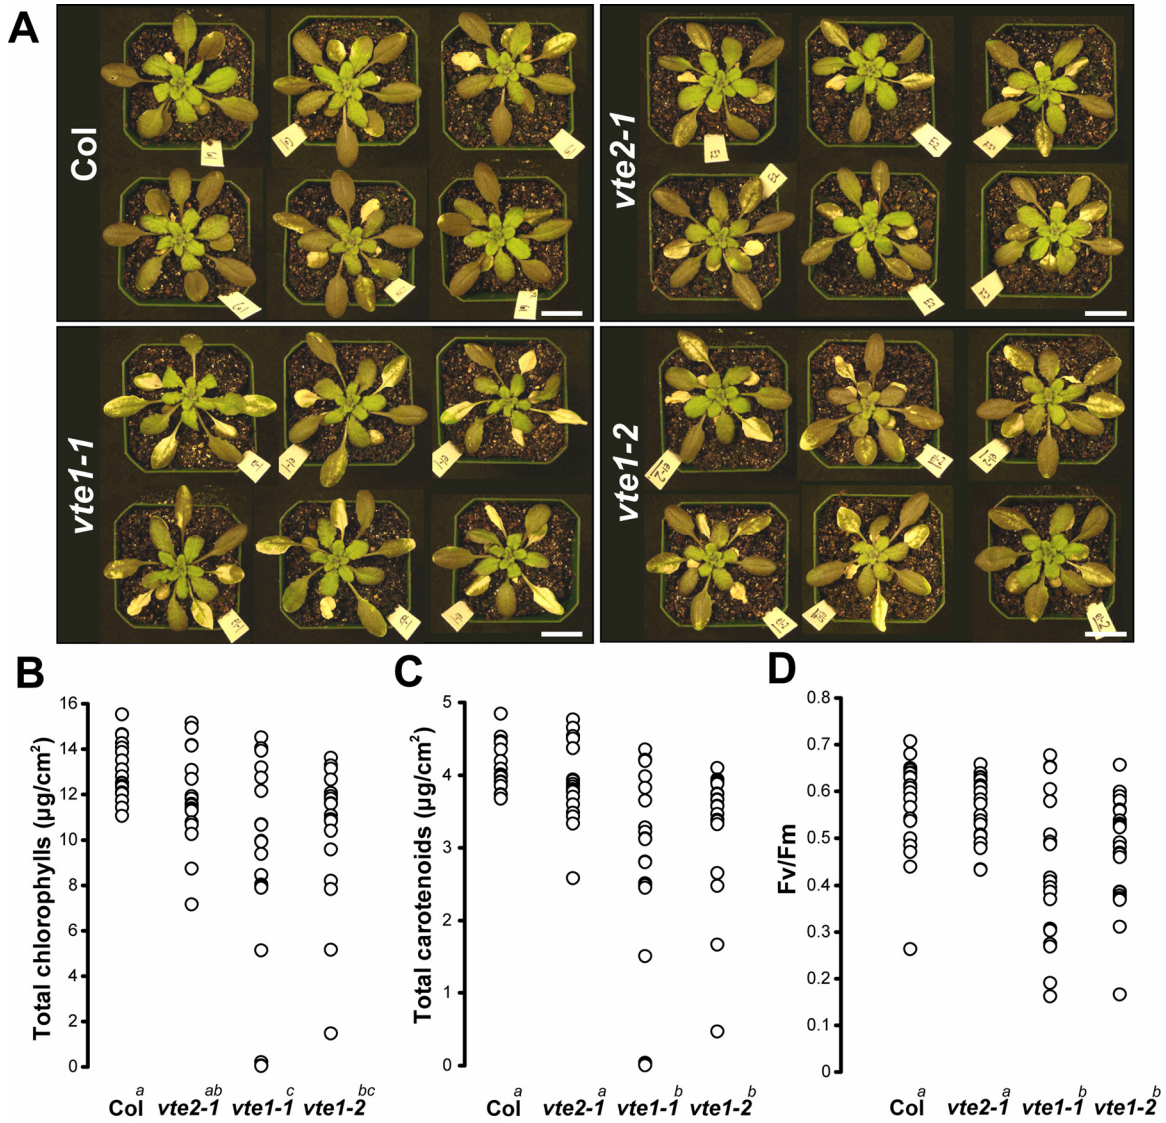

**Supplemental Figure 2.** Phenotypic and Photosynthetic Responses of Col and the *vte2* and *vte1* Mutants to HL stress.

Plants were grown under permissive conditions for four weeks and then transferred to HL stress in the middle of the day. When significance is observed between genotypes (ANOVA,  $P < 0.05$ ), pair-wise comparison of least square means is evaluated and non-significant groups are indicated by *a*, *b* or *c* with *a* being the highest group.

(A) Six representative plants after 3 days of HL1800. Bars = 2 cm.

(B) and (C) Individual values of total chlorophyll (B) and carotenoid (C) contents from 19 leaves after 4 days of HL1800.

(D) Individual values of Fv/Fm from 19 leaves after 24 h of HL1800.
