# Supplementary material
Source: PubMed Central journal article supplement (PMC1626601)
Supplement: plntcell_tpc.105.039404_3.pdf [file plntcell_tpc.105.039404_3.pdf]

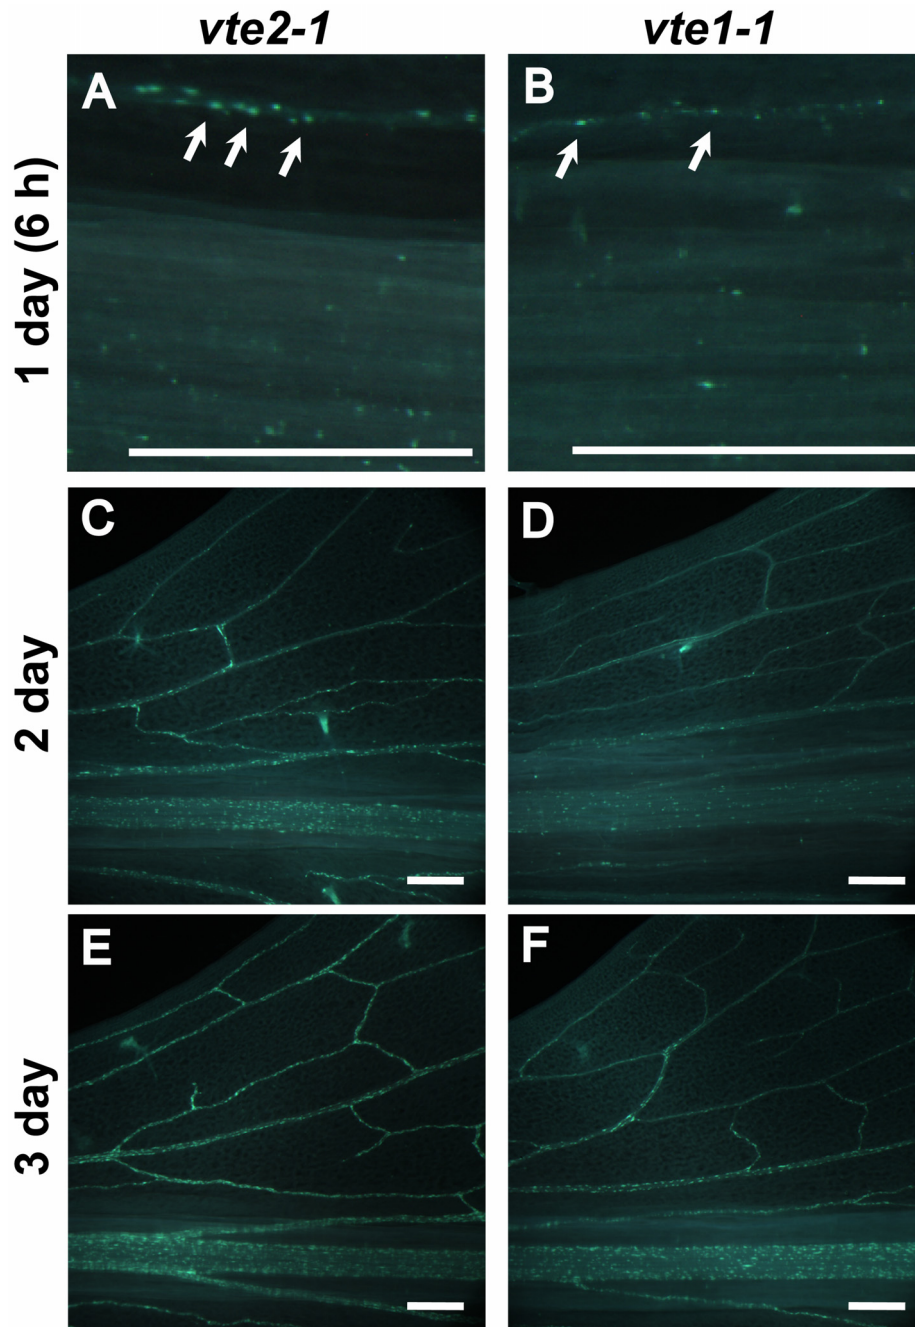

**Supplemental Figure 3.** Aniline Blue Positive Fluorescence in Leaves of the *vte2* and *vte1* Mutant During Low Temperature Treatment.

*vte2-1* (A, C and E) and *vte1-1* (B, D and F) were grown under permissive conditions for four weeks and then transferred to 7.5°C at the beginning of the light cycle. Leaves were harvested in the middle of the day after 1 day (6 h) (A and B), 2 days (C and D) and 3 days (E and F) of 7.5°C treatment and aniline blue positive fluorescence were observed at leaf petioles (A and B), the lower half of leaves (C to F). Arrows in (A and B) denote fluorescence spots initially appeared at side veins of petioles. Bars = 500  $\mu$ m.
