# Supplementary material
Source: PubMed Central journal article supplement (PMC1626601)
Supplement: plntcell_tpc.105.039404_5.pdf [file plntcell_tpc.105.039404_5.pdf]

**Supplemental Table 2. Content of Individual Photosynthetic Pigments of Col and the *vte2* Mutant During Low Temperature (7.5°C) Treatment.**

| Days<br>in cold | lutein   |               | β-car   |               | N      |               | V      |               | A     |               | Z     |               |
|-----------------|----------|---------------|---------|---------------|--------|---------------|--------|---------------|-------|---------------|-------|---------------|
|                 | Col      | <i>vte2-1</i> | Col     | <i>vte2-1</i> | Col    | <i>vte2-1</i> | Col    | <i>vte2-1</i> | Col   | <i>vte2-1</i> | Col   | <i>vte2-1</i> |
| 0               | 154 ± 16 | 165 ± 10      | 66 ± 10 | 79 ± 6        | 43 ± 3 | 46 ± 2        | 37 ± 3 | 40 ± 3        | 1 ± 0 | 1 ± 0         | 0 ± 0 | 0 ± 0         |
| 1               | 148 ± 7  | 167 ± 21      | 65 ± 4  | 73 ± 14       | 39 ± 2 | 45 ± 6        | 27 ± 3 | 31 ± 5        | 4 ± 1 | 4 ± 2         | 0 ± 0 | 0 ± 0         |
| 2               | 154 ± 7  | 170 ± 8       | 64 ± 7  | 72 ± 8        | 42 ± 2 | 43 ± 3        | 34 ± 2 | 41 ± 3        | 3 ± 0 | 2 ± 1         | 0 ± 0 | 0 ± 0         |
| 5               | 167 ± 8  | 168 ± 9       | 63 ± 3  | 66 ± 4        | 40 ± 1 | 42 ± 3        | 46 ± 3 | 50 ± 3        | 2 ± 2 | 2 ± 1         | 0 ± 0 | 0 ± 0         |
| 7               | 160 ± 11 | 160 ± 11      | 58 ± 4  | 58 ± 4        | 42 ± 3 | 42 ± 3        | 46 ± 8 | 46 ± 8        | 4 ± 1 | 4 ± 1         | 0 ± 0 | 0 ± 0         |
| 14              | 159 ± 13 | 146 ± 26      | 61 ± 3  | 54 ± 13       | 45 ± 2 | 40 ± 9        | 46 ± 4 | 40 ± 6        | 2 ± 2 | 5 ± 2         | 0 ± 0 | 0 ± 0         |
| 28              | 184 ± 14 | 105 ± 9**     | 86 ± 13 | 48 ± 7**      | 55 ± 3 | 27 ± 5**      | 46 ± 3 | 30 ± 1**      | 2 ± 1 | 3 ± 1         | 0 ± 0 | 0 ± 0         |

  

| Days<br>in cold | total Car |               | Chl <b>b</b> |               | Chl <b>a</b> |               | total Chl  |               | Chl <b>a</b> /Chl <b>b</b> |               |
|-----------------|-----------|---------------|--------------|---------------|--------------|---------------|------------|---------------|----------------------------|---------------|
|                 | Col       | <i>vte2-1</i> | Col          | <i>vte2-1</i> | Col          | <i>vte2-1</i> | Col        | <i>vte2-1</i> | Col                        | <i>vte2-1</i> |
| 0               | 301 ± 32  | 330 ± 21      | 363 ± 23     | 388 ± 18      | 842 ± 75     | 931 ± 48      | 1205 ± 98  | 1319 ± 65     | 2.32 ± 0.06                | 2.40 ± 0.04   |
| 1               | 283 ± 14  | 319 ± 43      | 320 ± 11     | 359 ± 41      | 759 ± 34     | 854 ± 107     | 1079 ± 45  | 1212 ± 148    | 2.37 ± 0.03                | 2.38 ± 0.03   |
| 2               | 297 ± 18  | 329 ± 19      | 316 ± 6      | 317 ± 30      | 753 ± 38     | 790 ± 68      | 1069 ± 44  | 1107 ± 98     | 2.39 ± 0.07                | 2.49 ± 0.03   |
| 5               | 319 ± 14  | 327 ± 18      | 258 ± 7      | 262 ± 16      | 593 ± 18     | 613 ± 30      | 851 ± 24   | 875 ± 46      | 2.30 ± 0.02                | 2.34 ± 0.05   |
| 7               | 309 ± 25  | 309 ± 25      | 246 ± 17     | 246 ± 17      | 559 ± 32     | 559 ± 32      | 805 ± 49   | 805 ± 49      | 2.28 ± 0.03                | 2.28 ± 0.03   |
| 14              | 313 ± 23  | 286 ± 54      | 251 ± 9      | 209 ± 39      | 581 ± 18     | 499 ± 95      | 832 ± 26   | 708 ± 134     | 2.32 ± 0.03                | 2.39 ± 0.02   |
| 28              | 374 ± 30  | 213 ± 19**    | 304 ± 27     | 138 ± 21**    | 729 ± 89     | 357 ± 49**    | 1033 ± 114 | 495 ± 69**    | 2.39 ± 0.12                | 2.60 ± 0.18** |

Values are expressed as pmol/mg FW. Data are means ± SD (n = 4 or 5). Student's *t* tests of *vte2-1* relative to Col (\* P < 0.05, \*\* P < 0.01). N, neoxanthin; β-car, β-carotene; V, violaxanthin; A, antheraxanthin; Z, zeaxanthin; total Car, total carotenoids; Chl**b**, chlorophyll *b*; Chl**a**, chlorophyll *a*; total Chl, total chlorophylls.
